# Supplementary material for: Social determinants of mortality due to visceral leishmaniasis in Brazil (2001-2015): an ecological study
Source: PubMed Central journal article supplement (PMC7083365; doi:10.1590/0037-8682-0262-2019), 2019-12-20
Supplement: 1678-9849-rsbmt-53-e20190262-suppl1.pdf [file 1678-9849-rsbmt-53-e20190262-suppl1.pdf]

**TABLE 1:** Social determinants of health included in the data analysis (n=49).

| <b>Indicators and blocks</b>                                                                                                                         |
|------------------------------------------------------------------------------------------------------------------------------------------------------|
| <b>Block 1 - Synthetic indicators of Social Vulnerability and Human Development</b>                                                                  |
| Social Vulnerability Index (SVI)                                                                                                                     |
| Municipal Human Development Index (MHDI)                                                                                                             |
| <b>Block 2 - Domains of the Social Vulnerability Index</b>                                                                                           |
| SVI Urban infrastructure                                                                                                                             |
| SVI Human capital                                                                                                                                    |
| SVI Income and work                                                                                                                                  |
| <b>Block 3 - Domains of the municipal Human Development Index</b>                                                                                    |
| MHDI Longevity                                                                                                                                       |
| MHDI Education                                                                                                                                       |
| MHDI Income                                                                                                                                          |
| <b>Block 4 - SVI Urban infrastructure subdomains</b>                                                                                                 |
| % of people in households with inadequate water supply and sewage                                                                                    |
| % of the population living in urban households without the garbage collection service                                                                |
| % of people living in households with a per capita income lower than half a minimum wage (from 2010) and spend more than an hour to go to work       |
| <b>Block 5 - SVI Human capital subdomains</b>                                                                                                        |
| Infant mortality                                                                                                                                     |
| % of children aged 0-5 years who do not attend school                                                                                                |
| % of people aged 6-14 years who do not attend school                                                                                                 |
| % of women aged 10-17 years who had children                                                                                                         |
| % of mothers heads of household who did not complete the elementary education and with a child aged under 15 years                                   |
| Illiteracy rate of the population aged ≥15 years                                                                                                     |
| % of children living in households where none of the residents have completed elementary education                                                   |
| % of people aged 15-24 years who neither study nor work and have a per capita household income equal to or less than half a minimum wage (from 2010) |
| <b>Block 6 - SVI income and work subdomains</b>                                                                                                      |
| Proportion of people with per capita household income equal to or less than half a minimum wage (from 2010)                                          |
| Unemployment rate of the population aged ≥18 years                                                                                                   |
| % of people aged ≥18 years who did not complete the elementary education and have no formal employment                                               |
| % of people in households with per capita income less than half a minimum wage (from 2010) and are dependent of income from elderly                  |
| Occupancy rate of persons aged 10-14 years                                                                                                           |
| <b>Block 7 - MHDI longevity subdomains</b>                                                                                                           |
| Life expectancy at birth                                                                                                                             |

CONTINUE....

---

**Block 8 - MHDl education subdomains**

---

Schooling sub index

% of people aged  $\geq 18$  years with completed elementary education

School attendance sub index

% of children aged 5-6 years who attend school

% of people aged 11-13 years who completed elementary education or are in last years of their elementary education

% of people aged 15-17 years who completed elementary education

% of people aged 18-20 years who completed high school

---

**Block 9 - MHDl Income subdomains**

---

Per capita income

---

**Block 10 - Other indicators of social vulnerability and human development**

---

Illiteracy rate of people aged  $\geq 18$  years

Illiteracy rate of people aged  $\geq 25$  years

Per capita income of people vulnerable to poverty

% of people who have income from work

Gini index

% of employed aged  $\geq 18$  years with formal work

% of employed aged  $\geq 18$  years without formal work

% of employed aged  $\geq 18$  years with formal work in public sector

% of self-employed aged  $\geq 18$  years

% of employers aged  $\geq 18$  years

Degree of formalization of the employed aged  $\geq 18$  years

% of employed people aged  $\geq 18$  years who completed elementary education

% of employed people aged  $\geq 18$  years who completed high school

% of employed people aged  $\geq 18$  years who graduated from college

Average income of employed persons aged  $\geq 18$  years

% of employed persons aged  $\geq 18$  years without income

---
