# Supplementary material for: Social determinants of mortality due to visceral leishmaniasis in Brazil (2001-2015): an ecological study
Source: PubMed Central journal article supplement (PMC7083365; doi:10.1590/0037-8682-0262-2019), 2019-12-20
Supplement: 1678-9849-rsbmt-53-e20190262-suppl2.pdf [file 1678-9849-rsbmt-53-e20190262-suppl2.pdf]

**TABLE 2:** Social determinants of health associated with mortality due to leishmaniasis in the Brazilian states

| <b>Social determinants of health (SDH)</b>                                                                                                        | <b>Coefficient</b> | <b>t-statistic</b> | <b>P-value</b> |
|---------------------------------------------------------------------------------------------------------------------------------------------------|--------------------|--------------------|----------------|
| <b>Block 1 - Synthetic indicators of Social Vulnerability and Human Development</b>                                                               |                    |                    |                |
| Constant                                                                                                                                          | 249.939            | 129.883            | 0.206          |
| Social Vulnerability Index (SVI)                                                                                                                  | -0.7168            | -0.55037           | 0.587          |
| Municipal Human Development Index (MHDI)                                                                                                          | -284.658           | -131.204           | 0.201          |
| <b>Block 2 - Domains of the Social Vulnerability Index</b>                                                                                        |                    |                    |                |
| Constant                                                                                                                                          | 0.025052           | 0.084978           | 0.933          |
| SVI urban infrastructure                                                                                                                          | -0.58397           | -0.93874           | 0.357          |
| SVI human capital                                                                                                                                 | -0.03852           | -0.02232           | 0.982          |
| SVI income and work                                                                                                                               | 113.209            | 0.703285           | 0.488          |
| <b>Block 3 - Domains of the municipal Human Development Index</b>                                                                                 |                    |                    |                |
| Constant                                                                                                                                          | 415.361            | 138.378            | 0.179          |
| MHDI longevity                                                                                                                                    | -519.888           | -0.82902           | 0.415          |
| MHDI education                                                                                                                                    | 483.948            | 182.823            | 0.080          |
| MHDI income                                                                                                                                       | -378.235           | -115.753           | 0.258          |
| <b>Block 4 - SVI Urban infrastructure subdomains</b>                                                                                              |                    |                    |                |
| Constant                                                                                                                                          | 0.34427            | 226.467            | 0.033          |
| % of people in households with inadequate water supply and sewage                                                                                 | -0.01409           | -165.531           | 0.111          |
| % of the population living in urban households without the garbage collection service                                                             | 0.046009           | 277.332            | 0.010*         |
| % of people living in households with a per capita income lower than half a minimum wage (from 2010) and spend more than an hour to go to work    | -0.01797           | -15.873            | 0.126          |
| <b>Block 5 - SVI Human capital subdomains</b>                                                                                                     |                    |                    |                |
| Constant                                                                                                                                          | -0.2469            | -0.52858           | 0.603          |
| Infant mortality                                                                                                                                  | 0.038386           | 137.215            | 0.186          |
| % of children aged 0-5 years who do not attend school                                                                                             | -0.0009            | -0.09345           | 0.926          |
| % of people aged 6-14 years who do not attend school                                                                                              | -0.17718           | -359.938           | 0.002*         |
| % of women aged 10-17 years who had children                                                                                                      | 0.529425           | 41.596             | 0.000*         |
| % of mothers who are heads of the household who did not finish elementary education and with a child aged below 15 years                          | -0.04108           | -199.257           | 0.061          |
| Illiteracy rate of the population aged ≥15 years                                                                                                  | 0.015218           | 0.554358           | 0.586          |
| % of children living in households where none of the residents have completed elementary education                                                | -0.01713           | -11.598            | 0.261          |
| % of people aged 15 to 24 who neither study nor work and have a per capita household income equal to or less than half a minimum wage (from 2010) | -0.00433           | -0.15139           | 0.881          |

CONTINUE....

| <b>Block 6 - SVI Income and Work subdomains</b>                                                                                     |           |          |        |
|-------------------------------------------------------------------------------------------------------------------------------------|-----------|----------|--------|
| Constant                                                                                                                            | 151.792   | 25.628   | 0.018  |
| Proportion of people with per capita household income equal to or less than half a minimum wage (from 2010)                         | 0.026026  | 154.767  | 0.136  |
| Unemployment rate of the population aged ≥18 years                                                                                  | 0.15252   | -29.546  | 0.007* |
| % of people aged ≥18 years who did not complete elementary education and have no formal employment                                  | -0.02451  | -11.801  | 0.251  |
| % of people in households with per capita income less than half a minimum wage (from 2010) and are dependent of income from elderly | 0.128724  | 0.78679  | 0.440  |
| Occupancy rate of persons aged 10-14 years                                                                                          | -0.06515  | -132.226 | 0.200  |
| <b>Block 7 - MHDl longevity subdomains</b>                                                                                          |           |          |        |
| Constant                                                                                                                            | 464.927   | 192.048  | 0.066  |
| Life expectancy at birth                                                                                                            | -0.05998  | -182.203 | 0.080  |
| <b>Block 8 - MHDl education subdomains</b>                                                                                          |           |          |        |
| Constant                                                                                                                            | -485.388  | -131.447 | 0.204  |
| Schooling sub index                                                                                                                 | 127.915   | 0.504881 | 0.619  |
| % of people aged ≥18 years with completed elementary education                                                                      | -126.651  | -0.49846 | 0.623  |
| School attendance sub index                                                                                                         | 203.811   | 0.766518 | 0.452  |
| % of children aged 5-6 years who attend school                                                                                      | -0.49636  | -0.74839 | 0.463  |
| % of people aged 11-13 years who completed elementary education or are in last years of the elementary education                    | -0.45384  | -0.7035  | 0.490  |
| % of people aged 15-17 years who completed elementary education                                                                     | -0.48807  | -0.73109 | 0.473  |
| % of people aged 18-20 years who completed high school                                                                              | -0.5771   | -0.84299 | 0.409  |
| <b>Block 9 - MHDl income subdomains</b>                                                                                             |           |          |        |
| Constant                                                                                                                            | 0.489711  | 311.116  | 0.004  |
| Per capita income                                                                                                                   | -0.00036  | -171.522 | 0.048* |
| <b>Block 10 - Other indicators on social vulnerability and human development</b>                                                    |           |          |        |
| Constant                                                                                                                            | -874.504  | -0.42407 | 0.680  |
| Illiteracy rate of people aged ≥18 years                                                                                            | 154.751   | -349.353 | 0.005* |
| Illiteracy rate of people aged ≥25 years                                                                                            | 129.939   | 353.438  | 0.005* |
| Per capita income of people vulnerable to poverty                                                                                   | 0.024644  | 163.518  | 0.133  |
| % of people who have income from work                                                                                               | -0.01423  | -0.44997 | 0.662  |
| Gini index                                                                                                                          | 138.591   | 246.624  | 0.033* |
| % of employed aged ≥18 years with formal work                                                                                       | 0.092662  | 0.44399  | 0.666  |
| % of employed aged ≥18 years without formal work                                                                                    | -0.05158  | -0.26604 | 0.795  |
| % of employed aged ≥18 years with formal work in public sector                                                                      | 0.165275  | 0.772904 | 0.457  |
| % of self-employed aged ≥18 years                                                                                                   | -0.06876  | -0.34904 | 0.734  |
| % of employers aged ≥18 years                                                                                                       | 0.780477  | 264.799  | 0.024* |
| Degree of formalization of the employed aged ≥18 years                                                                              | -0.11439  | -136.603 | 0.201  |
| % of employed people aged ≥18 years who completed elementary education                                                              | -0.157882 | 227.542  | 0.046* |
| % of employed people aged ≥18 years who completed high school                                                                       | -0.17849  | -273.257 | 0.021* |
| % of employed people aged ≥18 years who graduated from college                                                                      | 0.062241  | 0.93755  | 0.370  |
| Average income of employed persons aged ≥18 years                                                                                   | -0.00168  | -231.717 | 0.042* |
| % of employed persons aged ≥18 years without income                                                                                 | 0.055523  | 0.325147 | 0.751  |

\*Statistical significance
